# Supplementary material for: A Fungal Defensin Inhibiting Bacterial Cell-Wall Biosynthesis with Non-Hemolysis and Serum Stability
Source: MDPI journal article supplement (doi:10.3390/jof8020174), 2022-02-10
Supplement: s1 [file s1]

## Supplementary Material

Supplement to: Sudong Qi, Bin Gao and Shunyi Zhu. A Fungal Defensin Inhibiting Bacterial Cell-Wall Biosynthesis with Non-Hemolysis and Serum Stability.

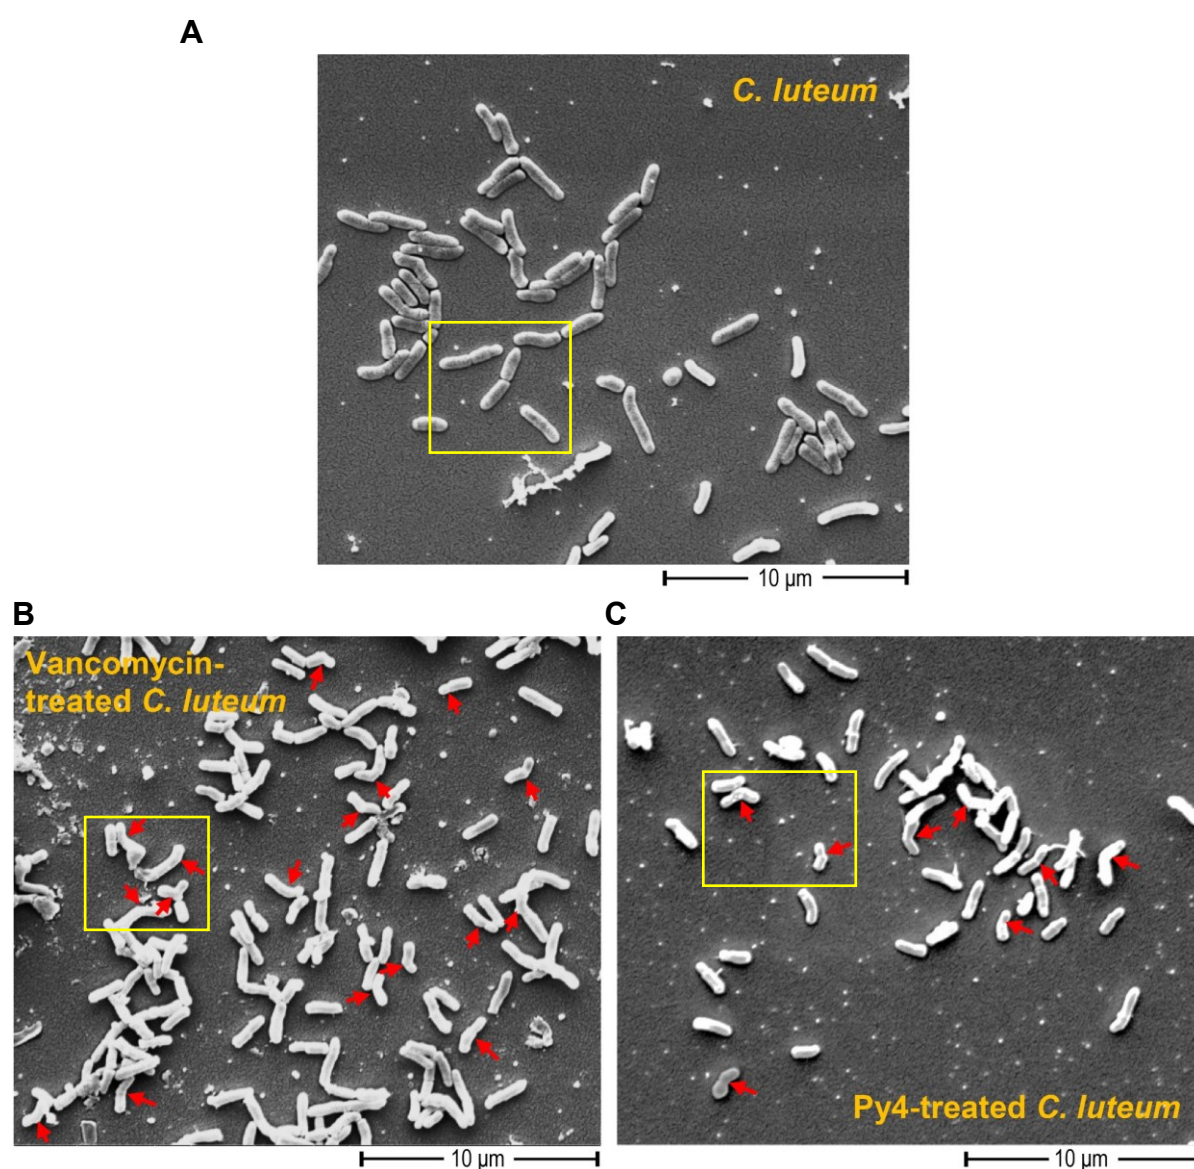

**Figure S1.** Scanning electron microscopic observation of Py4-induced *C. luteum* deformation. (A) *C. luteum* without peptides. (B) Vancomycin-treated *C. luteum*. (C) Py4-treated *C. luteum*. Red arrows indicate cells with an obvious morphological change. Zoomed-in views appeared in Figure 4B are boxed in yellow.
